# Supplementary material for: Pharmacologic Ascorbate Radiosensitizes Pancreatic Cancer but Radioprotects Normal Tissue: The Role of Oxidative Stress-Induced Lipid Peroxidation
Source: MDPI journal article supplement (doi:10.3390/antiox13030361), 2024-03-18
Supplement: s1 [file s1]

# Supplemental Materials For:

## **Pharmacologic Ascorbate Radiosensitizes Pancreatic Cancer but Radioprotects Normal Tissue: The Role of Oxidative Stress-induced Lipid Peroxidation**

Gloria Y. Chen<sup>1\*</sup>, Brianne R. O’Leary<sup>1,2\*</sup>, Juan Du<sup>1,2</sup>, Rory S. Carroll<sup>1</sup>, Garrett J. Steers<sup>1</sup>, Garry R. Buettner<sup>2</sup>, and Joseph J. Cullen<sup>1,2</sup>

From the Departments of Surgery<sup>1</sup> and Free Radical and Radiation Biology Division, Department of Radiation Oncology<sup>2</sup>, The University of Iowa Carver College of Medicine, Iowa City, IA, USA.

**\*\*Contributed equally to the authorship of this work.**

Address correspondence to: Joseph J. Cullen, M.D.  
1528 JCP, University of Iowa Hospitals and Clinics, Iowa City, IA 52242  
[joseph-cullen@uiowa.edu](mailto:joseph-cullen@uiowa.edu)  
W: (319) 353-8297, Fax: (319) 356-8378

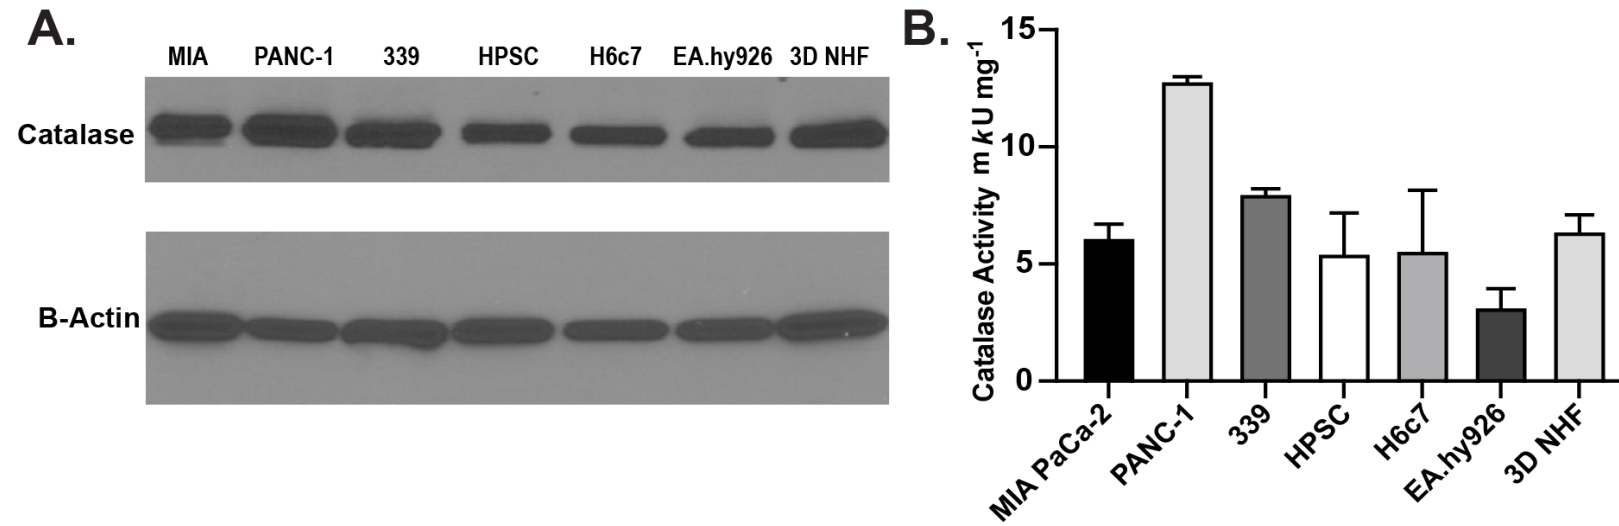

**Supplemental Figure S1.** Catalase protein expression and activity.

**A.** Representative Western blot image of catalase protein expression in various PDAC and normal pancreas cell lines (MIA PaCa-2, PANC-01, PDX-339, HPSC (human pancreatic stellate cells), H6c7 (non-tumorigenic pancreatic epithelial cells), EA.hy926 (human umbilical vein cells), and 3D NHF (3-day normal human fibroblast cells)).

**B.** Mean catalase activity levels in the same cell lines, means  $\pm$  SEM,  $n = 3$ .
